# Supplementary material for: POLYRETINA restores light responses in vivo in blind Göttingen minipigs
Source: Springer Nature journal article supplement (doi:10.1038/s41467-022-31180-z), 2022-06-27
Supplement: 41467_2022_31180_MOESM3_ESM.pdf [file 41467_2022_31180_MOESM3_ESM.pdf]

## **Description of Additional Supplementary Information**

Title: Supplementary Movie 1

Description: POLYRETINA injection in blind Göttingen minipigs.
